# Supplementary material
Source: Springer Nature journal article supplement (https://www.springermedizin.de/resource/supplementary/13046_2009_273_MOESM4_ESM.pdf/9662008)

**A**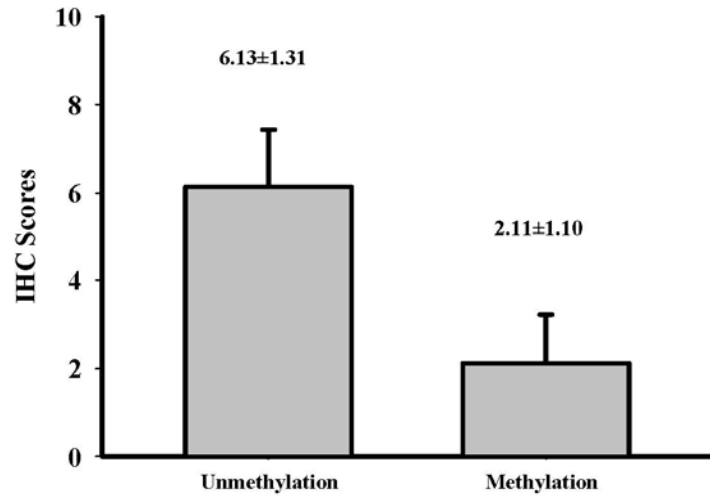

**Methylation Status of WIF-1 Promoter**

**B**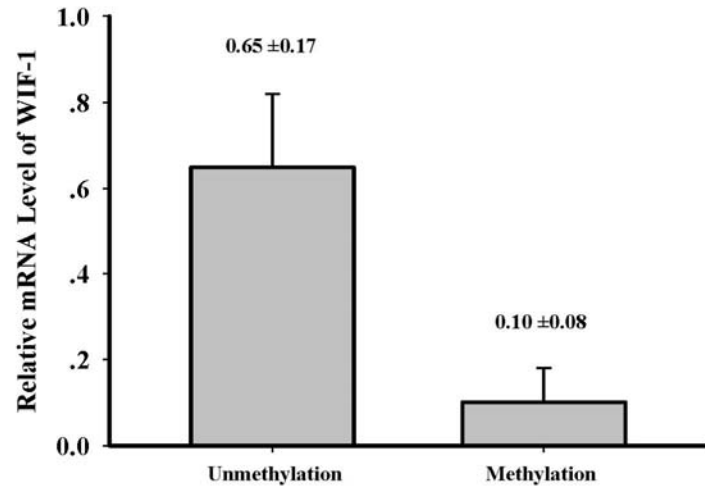

**Methylation Status of WIF-1 Promotor**

Supplement: MOESM4 [file 9662008]
